# Supplementary material
Source: MDPI journal article supplement (https://www.mdpi.com/2073-4344/13/9/1245)
Supplement: s1 [file s1]

# RuNi/MMO Catalysts Derived from a NiAl-NO<sub>3</sub>-LDH Precursor for CO Selective Methanation in H<sub>2</sub>-Rich Gases

Zhihui Li <sup>†</sup>, Xinyuan Zhao <sup>†</sup>, Jiteng Ma and Xinfu Dong <sup>\*</sup>

Guangdong Provincial Key Laboratory of Green Chemical Product Technology, School of Chemistry and Chemical Engineering, South China University of Technology, Guangzhou 510640, China.

<sup>\*</sup> Correspondence: cexfdong@scut.edu.cn (X.D.)

<sup>†</sup> These authors contributed equally to this work.

**Table S1.** Structural characteristics of the prepared LDHs.

| Samples                | LDHs-C | LDHs-N (0.03M) | LDHs-N (0.06M) | LDHs-N (0.09M) | LDHs-N (0.12M) |
|------------------------|--------|----------------|----------------|----------------|----------------|
| d <sub>003</sub> , nm  | 0.781  | 0.795          | 0.831          | 0.834          | 0.827          |
| D <sub>LDHs</sub> , nm | 5.89   | 4.48           | 4.84           | 4.65           | 5.05           |

**Table S2.** C and N chemical compositions of LDHs.

| Samples        | N (mol/g) | C (mol/g) |
|----------------|-----------|-----------|
| LDH-C          | 0.09      | 1.86      |
| LDH-N (0.09 M) | 1.89      | 0.72      |

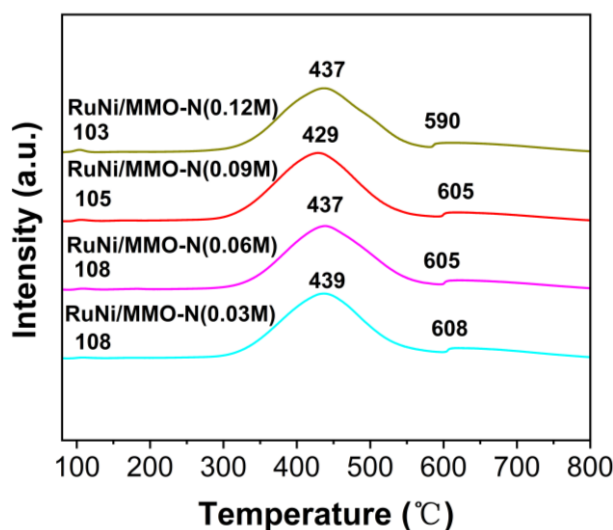

**Figure S1.** H<sub>2</sub>-TPR profiles of different HNO<sub>3</sub>–ethanol solutions concentrations (0.03 M, 0.06 M, 0.09 M, and 0.12 M) of the RuNi/MMO catalysts.

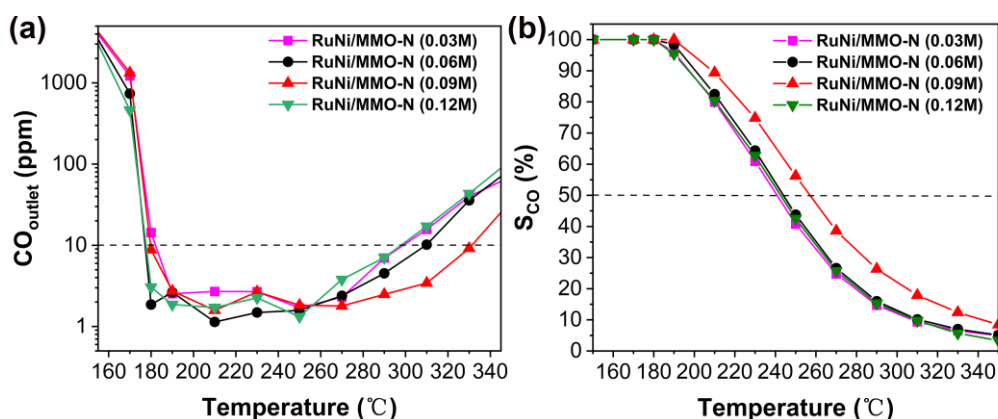

**Figure S2.** (a) The CO outlet concentration and (b) the selectivity of CO methanation over the different RuNi/MMO-N catalysts.

**Table S3.** The physicochemical properties of the RuNi/MMO-C and RuNi/MMO-N catalysts.

| Catalysts  | $S_{BET}^1$<br>( $m^2/g$ ) | Pore size <sup>2</sup><br>(nm) | $V_{BJH}^3$<br>( $cm^3/g$ ) | Metal load <sup>4</sup> (wt%) |       |
|------------|----------------------------|--------------------------------|-----------------------------|-------------------------------|-------|
|            |                            |                                |                             | Ni                            | Ru    |
| RuNi/MMO-C | 75.479                     | 9.095                          | 0.230                       | 45.556                        | 0.256 |
| RuNi/MMO-N | 128.873                    | 6.839                          | 0.234                       | 47.177                        | 0.336 |

<sup>1</sup> Obtained from the BET equation.

<sup>2</sup> Barrett–Joyner–Halenda (BJH) desorption average pore diameter.

<sup>3</sup> BJH desorption pore volume.

<sup>4</sup> Elemental loading amounts for Ni and/or Ru of the RuNi/MMO-C and RuNi/MMO-N catalysts from ICP-OES.

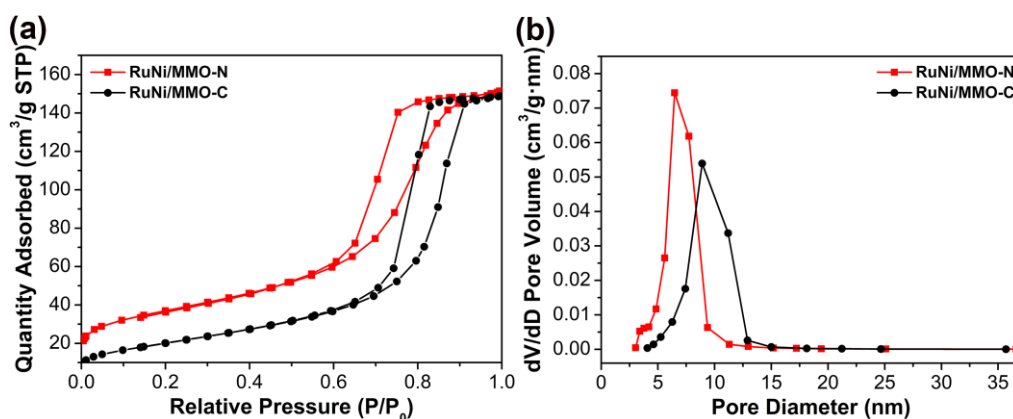

**Figure S3.** (a)  $N_2$  adsorption–desorption isotherms and (b) BJH pore size distributions of the RuNi/MMO-C and RuNi/MMO-N catalysts.

**Table S4.** The peak areas of  $CO_2$ -TPD for the RuNi/MMO-C and RuNi/MMO-N catalysts.

| Samples              | RuNi/MMO-C | RuNi/MMO-N |
|----------------------|------------|------------|
| weak basic sites     | 4.19       | 1.84       |
| moderate basic sites | 2.27       | 1.76       |
| strong basic sites   | 3.12       | 2.63       |

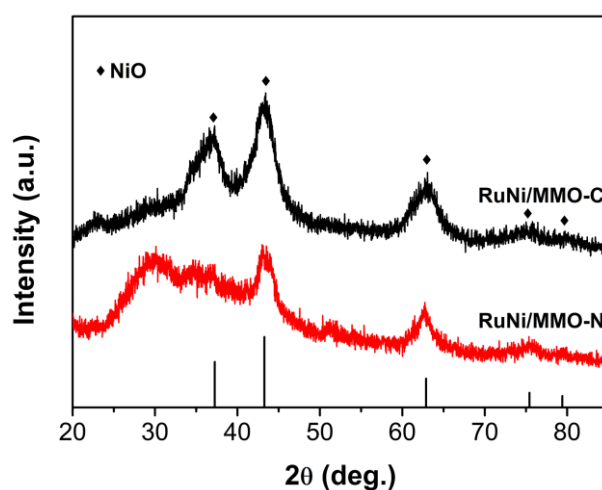

**Figure S4.** XRD patterns of the RuNi/MMO-C and RuNi/MMO-N catalysts.

**Table S5.** Summary of the CO-SMET performances for the Ru- and Ni-based catalysts developed in recent years.

| Catalysts                                              | Optimal temperature (°C) | [CO] <sub>min</sub> (ppm) | SWTW <sup>1</sup> | Stability (h) | Reference    |
|--------------------------------------------------------|--------------------------|---------------------------|-------------------|---------------|--------------|
| RuNi/MMO                                               | 190                      | <10                       | 180~260           | 120           | In this work |
| RuNi/Al <sub>2</sub> O <sub>3</sub> -CNTs/NF           | 200                      | <10                       | 190~250           | 120           | [15]         |
| Ru-Ni/Al <sub>2</sub> O <sub>3</sub>                   | 150                      | <100                      | -                 | -             | [20]         |
| Ru-Ni/TiO <sub>2</sub>                                 | 200                      | 11                        | -                 | -             | [57]         |
| Ru-Ni/Al <sub>2</sub> O <sub>3</sub>                   | 210                      | 11                        | -                 | 80            | [60]         |
| Ru-Ni/TiO <sub>2</sub> -Al <sub>2</sub> O <sub>3</sub> | 210                      | <10                       | 210~220           | 200           | [61]         |
| Ru/Ni-Al-oxide/NF                                      | 200                      | <10                       | 200~260           | 120           | [62]         |
| Ni/TiO <sub>2</sub>                                    | 225                      | 1000                      | -                 | -             | [63]         |
| SiO <sub>2</sub> /Ni-ZrO <sub>2</sub>                  | 200                      | <10                       | 200~240           | 100           | [64]         |
| Ni/ZrSBA-15                                            | 180                      | <10                       | 170~220           | -             | [65]         |
| Ni/CeO <sub>2</sub>                                    | 250                      | <10                       | 250~320           | -             | [66]         |
| Ru/Ni-TNTs                                             | 220                      | <10                       | 210~285           | -             | [67]         |

<sup>1</sup> A suitable working temperature window, with a CO concentration in the effluent of less than 10 ppm and a CO selectivity greater than 50%.
